# Supplementary material for: Preventing dataset shift from breaking machine-learning biomarkers
Source: PubMed Central journal article supplement (PMC8478611; doi:10.1093/gigascience/giab055), 2021-09-28
Supplement: giab055_response_to_reviewer_comments_original_submission.pdf [file giab055_response_to_reviewer_comments_original_submission.pdf]

## Author's Response To Reviewer Comments

Close

To make it easier to read, we have prepared our response to reviewer and editor comments as a pdf file, attached to the new submission -- reply.pdf

Close
