# Supplementary material for: Preventing dataset shift from breaking machine-learning biomarkers
Source: PubMed Central journal article supplement (PMC8478611; doi:10.1093/gigascience/giab055), 2021-09-28
Supplement: giab055_response_to_reviewer_comments_revision_1.pdf [file giab055_response_to_reviewer_comments_revision_1.pdf]

## Author's Response To Reviewer Comments

Close

We would like to thank the editor and reviewers for their thoughtful comments, which have helped us greatly improve our initial submission.

Close
